# Supplementary material
Source: HighWire-hosted journal article supplement (https://www.cancerbiomed.org/content/17/4/986)
Supplement: media-1 [file media-1.pdf]

# Supplementary materials

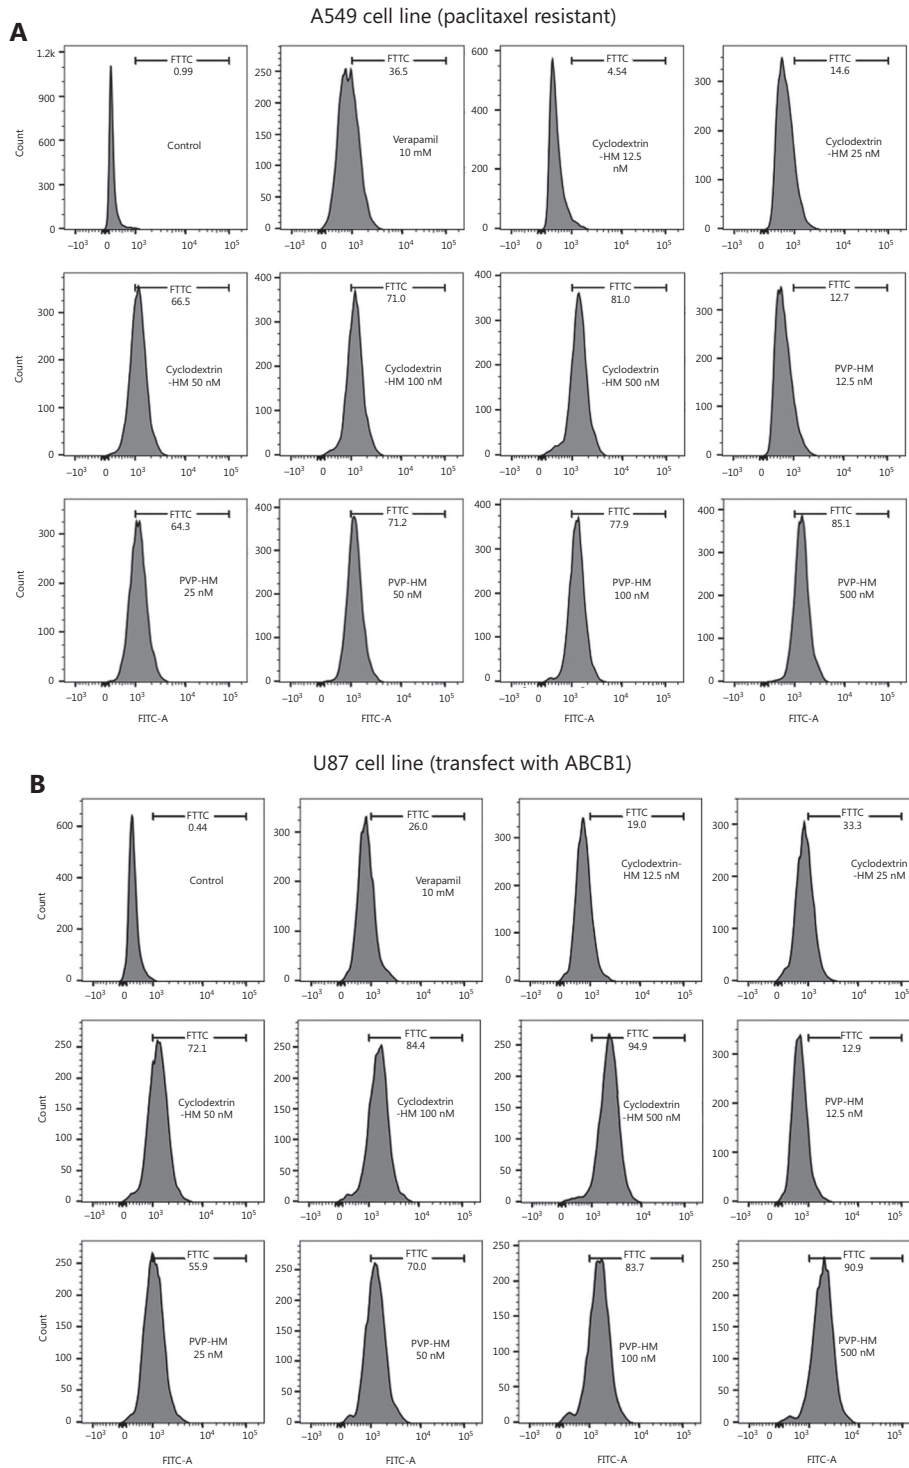

**Figure S1** (A) Mean fluorescence intensity of Rho123 in PTX-resistant A549 cancer cells detected by flow cytometry. (B) Mean fluorescence intensity of Rho123 in ABCB1 overexpressing U-87 MG cells detected by flow cytometry.

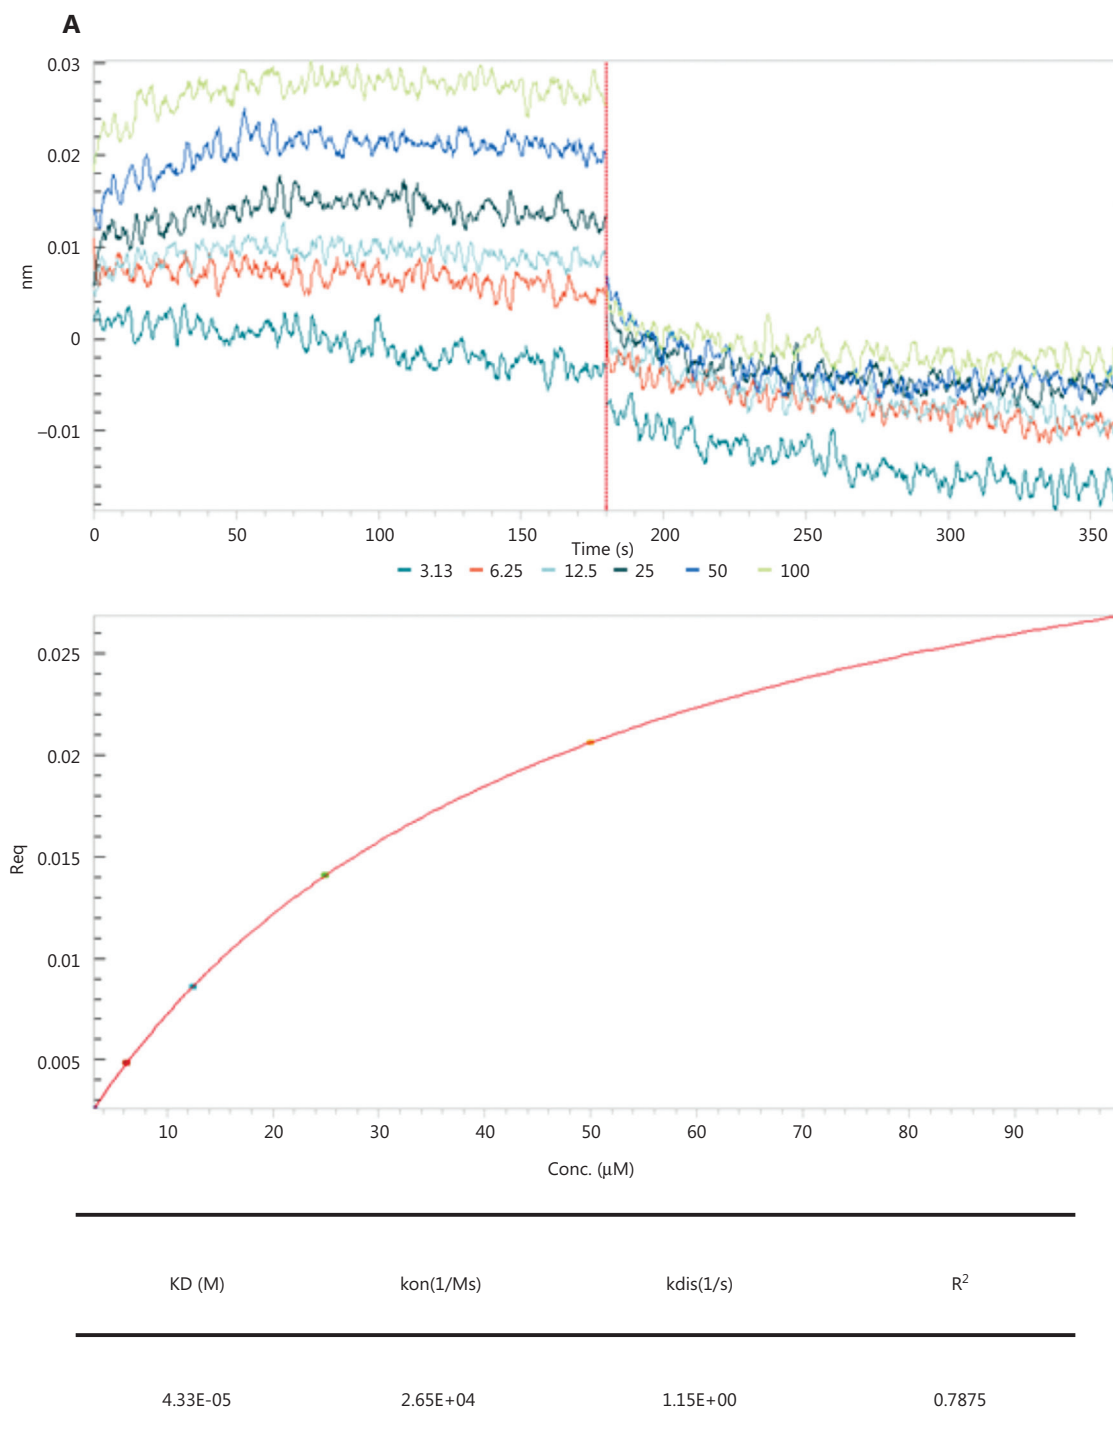

**Figure S2** Bio-layer interferometry analysis. The binding affinity of PTX and cyclodextrin-HM toward the plasma albumin protein was assessed with bio-layer interferometry (BLI) technology. In brief, whereas (A) the association constant ( $K_D$ ) of PTX toward albumin was  $4.33 \times 10^{-5}$  (43  $\mu\text{M}$ ), and (B) the association  $K_D$  of cyclodextrin-HM toward albumin was similar to the value of  $4.64 \times 10^{-5}$  (46.4  $\mu\text{M}$ ).

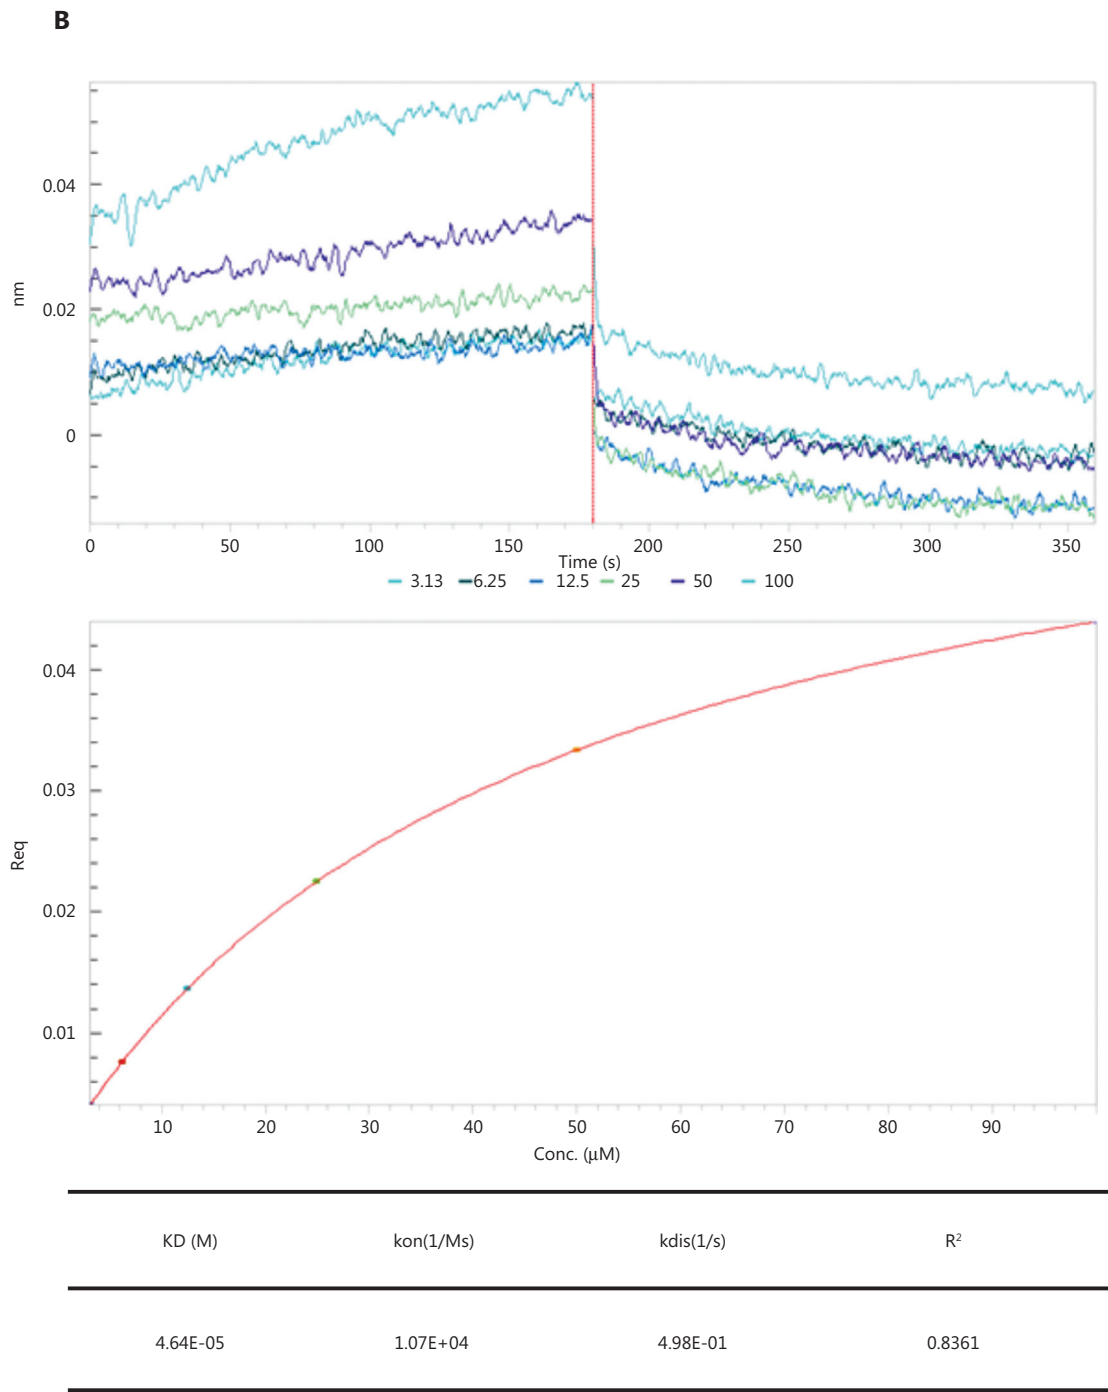

Figure S2 (continue)

**Table S1** Calibration equations, correlation coefficients ( $R^2$ ), linear ranges LOD, LOQ, and recovery of HM-Brain and HM-Plasma

| Compound  | Calibration equations | $R^2$         | Linear Range<br>( $\mu\text{g/L}$ ) | LOD<br>( $\mu\text{g/L}$ ) | LOQ<br>( $\mu\text{g/L}$ ) | Low ( $n = 6$ ) |         | Medium ( $n = 6$ ) |         | High ( $n = 6$ ) |         |
|-----------|-----------------------|---------------|-------------------------------------|----------------------------|----------------------------|-----------------|---------|--------------------|---------|------------------|---------|
|           |                       |               |                                     |                            |                            | Recovery (%)    | RSD (%) | Recovery (%)       | RSD (%) | Recovery (%)     | RSD (%) |
| HM-Brain  | $Y = 22007X + 6160.3$ | $R^2 = 0.996$ | 0.00036–0.11472                     | 0.0115                     | 0.115                      | 93.6 $\pm$ 12.5 | 13.6    | 106 $\pm$ 15.6     | 14.7    | 103 $\pm$ 13.3   | 12.9    |
| HM-Plasma | $Y = 75672X - 7561.6$ | $R^2 = 0.996$ | 0.0001–0.00736                      | 0.00115                    | 0.0575                     | 113 $\pm$ 15.3  | 13.5    | 113 $\pm$ 18.5     | 16.4    | 109 $\pm$ 11.5   | 10.6    |

All data are shown as mean  $\pm$  SD at each spiking level. At each level, 3 replicates and 2 measurements were used ( $n = 6$ ). The recovery rate was computed as the average recovery of 3 spiking levels.
